# Supplementary material for: Alcohol consumption and employment: a cross-sectional study of office workers and unemployed people
Source: PeerJ. 2020 Mar 24;8:e8774. doi: 10.7717/peerj.8774 (PMC7100587; doi:10.7717/peerj.8774)
Supplement: Supplemental Information 1 [file peerj-08-8774-s001.xls]

## Sheet: Sheet1
CARTELLA	ETA	SESSO	SIGDIE	vdt	CDT	Siero	ASTUL	ALTUL	GGTUL	MCV	CDT_dicot	numb_risk	gender
504\18	21	M	10	0	1		20	22	27	94	0	1	M
915\18	37	M	20	0	0.9		31	32	75	91.2	0	1	M
412\18	30	M	20	0	0.7		26	56	31	89.6	0	1	M
1324\18	34	M	15	0	0.6		19	13	16	89.5	0	1	M
1270\18	36	M	20	0	0.8		21	32	14	92	0	2	M
733\18	25	M	15	0	1		27	16	13	75.8	0	0	M
483\18	23	F	15	0	0.9		24	19	8	91.2	0	0	F
1288\18	28	M	10	0	0.9		16	14	27	90	0	1	M
447\18	21	M	5	0	0.8		22	17	16	85.7	0	1	M
380\18	36	M	20	0	0.9		16	19	34	91.4	0	1	M
885\18	57	M	17	0	1		23	32	46	92.2	0	2	M
528\18	36	M	10	0	0.6		24	23	21	93.7	0	1	M
962\18	56	M	30	0	0.8		17	15	31	96.9	0	1	M
406\18	42	M		0	1.1		23	29	37	95.4	0	1	M
973\18	33	M		0	0.6		23	16	7	90.6	0	1	M
539\18	24	M	10	0	0.4		17	23	24	90.4	0	1	M
464\18	42	M	10	0	0.7		30	40	161	95.7	0	1	M
393\18	24	M		0	0.8		66	61	14	86.5	0	2	M
506\18	30	M	7	0	0.6		22	16	19	96.9	0	1	M
438\18	30	M	4	0	0.5		21	38	32	82.5	0	1	M
1149\18	25	M	5	0	0.7		24	52	65	93.5	0	2	M
405\18	19	M		0	0.8		18	11	11	92.8	0	1	M
1233\18	64	M		0	0.7		17	20	20	94.7	0	2	M
1215\18	43	M		0	1.1		18	24	71	89.2	0	0	M
1025\18	26	M	20	0	0.9		17	18	16	94.5	0	1	M
820\18	22	M	12	0	0.9		17	16	15	92.2	0	0	M
364\18	47	M		0	1		30	37	70	99	0	1	M
664\18	40	M	5	0	0.4		26	38	69	99.4	0	1	M
748\18	24	M	12	0	0.5		23	43	60	95.5	0	1	M
1229\18	31	M		0	0.7		15	19	14	87.9	0	1	M
408\18	41	M		0	0.6		20	21	18	89.5	0	1	M
972\18	28	M	15	0	0.6		20	17	17	95.1	0	1	M
1311\18	27	M	30	0	0.6		18	16	10	95.5	0	1	M
721\18	31	M		0	0.7		22	27	19	88.3	0	1	M
802\18	67	F		0	0.4		14	9	18	75.7	0	2	F
1219\18	59	M	15	0	0.6		21	25	36	95.7	0	2	M
784\18	36	M	10	0	0.7		23	34	17	92.6	0	1	M
927\18	72	M		0	0.8		14	17	48	95	0	0	M
1264\18	27	M	5	0	1.2		15	11	17	87	0	1	M
467\18	25	F	7	0	0.6		11	9	9	89.9	0	1	F
959\18	39	M	6	0	0.6		23	22	18	93.8	0	1	M
923\18	61	M		0							1	0	M
956\18	56	M		0	0.6		19	22	26	92.9	0	1	M
660\18	40	M	8	0	0.6		15	18	25	87.2	0	1	M
482\18	46	M	15	0	0.5		16	15	14	96.8	0	4	M
916\18	31	M		0	0.6		18	27	60	94.6	0	2	M
826\18	37	M		0	0.7		49	58	82	92.8	0	1	M
465\18	34	M	20	0	1.1		21	21	16	100	0	1	M
1326\18	51	M	10	0	1		19	17	18	90.1	0	1	M
1298\18	36	F	10	0	0.9		16	11	9	90.1	0	1	F
1300\18	28	F		0	1.6		15	10	12	97	1	1	F
659\18	33	M		0	0.7		21	20	15	96.3	0	1	M
929\18	47	M	10	0	1.1		22	18	14	92.9	0	0	M
773\18	32	F	15	0	0.7		15	14	12	94.6	0	1	F
383\18	29	M		0	0.6		33	41	30	93.3	0	1	M
776\18	22	F	3	0	0.5		13	8	11	90.1	0	0	F
1272\18	22	M		0	0.9		67	66	14	88.3	0	2	M
815\18	26	M	24	0	0.6		17	11	16	98.3	0	1	M
722\18	43	M	10	0	0.5		21	19	12	92.7	0	1	M
800\18	22	M	10	0	0.2		14	11	12	91.5	0	0	M
440\18	52	M	30	0	0.6		15	12	9	97	0	4	M
754\18	34	M	15	0	0.5		19	13	15	92.6	0	1	M
544\18	35	M		0	1.3		15	15	18	87.5	0	2	M
684\18p	39	M	20	0	0.9		17	22	20	97.4	0	1	M
808\18	58	M	10	0	0.4		25	27	83	93.3	0	0	M
1034\18	28	M		0	0.5		25	23	19	94.2	0	1	M
396\18	28	F	5	0	0.9		23	26	9	88.8	0	0	F
1244\18	20	M	20	0	0.8		25	13	21	90.8	0	3	M
785\18	47	M	10	0	0.2		19	17	23	98.3	0	1	M
448\18 p	39	M	20	0	0.7		32	21	219		0	3	M
1273\18	29	M	20	0	0.6		19	17	20	85.6	0	1	M
1234\18	42	M		0	1.1		21	30	26	96.8	0	1	M
878\18	51	M	10	0	0.4		19	13	17	100	0	1	M
862\18	35	F		0	0.5		13	12	2	88.4	0	1	F
510\18	43	M		0	0.7		20	29	51	89.8	0	1	M
1231\18	50	M		0	1		30	48	30	83.2	0	2	M
703\18	38	M	20	0							1	1	M
463\18	45	M		0	0.9		17	21	23		0	0	M
958\18	33	M		0	0.8		21	25	23	97.5	0	1	M
1042\18	70	M	20	0	0.8		14	13	26	94.3	0	2	M
950\18	27	M	2	0	0.8		17	16	23	95	0	1	M
874\18	46	M		0	0.7		19	27	20	92.6	0	1	M
981\18	51	M	30	0	0.7		19	18	18	101	0	1	M
551\18	36	M	15	0	0.7		15	20	12	90.9	0	1	M
837\18	22	M		0	0.4		17	12	11	91.1	0	0	M
1285\18	50	M		0	0.7		20	22	41	87.2	0	1	M
1251\18	58	M		0	0.6		23	33	49	95.3	0	2	M
502\18	44	M		0	0.3		40	56	142	91.8	0	0	M
1211\18	50	M	10	0	0.3		15	19	15	87.2	0	1	M
466\18	27	F	6	0	0.5		15	13	11		0	1	F
955\18	56	M		0	0.7		21	27	30	94.8	0	1	M
421\18	32	M	10	0	0.4		17	20	15	84	0	3	M
752\18	35	M	20	0	0.8		16	34	40	98.3	0	1	M
936\18	32	M	10	0	0.8		18	23	35	87.1	0	1	M
732\18	35	M	10	0	1.2		15	11	25	94.3	0	3	M
657\18	60	M		0	0.7		15	21	19	91.6	0	1	M
960\18	38	F	6	0	0.8		12	8	12	90.7	0	1	F
1007\18	53	M	8	0	1		23	29	35	96.5	0	1	M
774\18	34	M	3	0	0.7		20	24	27	94.1	0	3	M
558\18	32	M	4	0	0.6		22	15	24	89.6	0	1	M
561\18	31	F	15	0	0.7		42	53	15	90.8	0	2	F
996\18	43	M	20	0	0.4		18	24	27	87.4	0	3	M
376\18	47	M	20	0	0.7		14	18	35	94.9	0	5	M
439\18	45	M	6	0	1		18	22	29	92.6	0	1	M
811\18	39	M	1	0	0.6		17	14	17	98.4	0	2	M
718\18	53	M		0	0.6		17	16	19	93.6	0	1	M
1139\18	52	M	15	0	1.4		39	74	49	88.3	0	3	M
1066\18	49	F		0	0.7		16	12	11	89.4	0	2	F
451\18	30	M	10	0	0.8		22	24	33	91.7	0	2	M
906\18	31	M		0	0.7		22	32	23	87.8	0	1	M
493\18	27	M	20	0	1.2		21	15	13	87.3	0	1	M
516\18	52	M	10	0	0.9		26	22	30		0	2	M
1337\18	41	M	15	0	1.1		18	19	61	84.3	0	2	M
844\18	34	M		0	0.7		38	77	123	89.1	0	1	M
688\18	27	F		0	1.1		16	11	10	70.7	0	0	F
594\18	30	F		0	0.8		15	12	9	95.1	0	1	F
1135\18	28	M	30	0							1	1	M
806\18	22	M		0	0.5		16	11	15	94.5	0	0	M
1217\18	46	M		0	0.6		29	48	188	85.5	0	1	M
509\18	20	M	15	0	0.6		28	18	17	97.9	0	0	M
944\18	58	M	15	0	0.5		19	33	45	95.2	0	1	M
450\18	32	M	8	0	1.1		40	23	12	91.4	0	1	M
497\18	47	M	20	0	1		20	35	33	91.7	0	2	M
934\18	57	M	10	0	0.7		14	16	40	93.3	0	1	M
801\18	38	M	15	0	0.6		17	26	14	96.4	0	1	M
387\18	28	M	15	0	0.7		41	42	20	97.2	0	1	M
1224\18	41	M		0	0.9		23	24	52	86.5	0	2	M
1239\18	43	M		0	0.8		18	16	52	93.1	0	1	M
961\18p	28	M		0							1	1	M
831\18	23	M	6	0	0.4		26	15	12	92.9	0	2	M
855\18	29	M	15	0	1.6		18	14	17	95.9	1	1	M
422\18	42	M	30	0	1		18	21	22	91.7	0	1	M
477\18	39	M		0	0.6		20	23	33	92.4	0	0	M
1241\18	50	M	15	0	0.7		34	76	52	87.2	0	2	M
867\18	51	M		0	0.6		13	11	19	92.1	0	3	M
479\18	38	M	20	0	0.9		28	19	37	93	0	2	M
441\18	49	M		0	0.8		23	27	34	91.4	0	0	M
876\18	29	M	10	0	0.7		28	62	51	97.7	0	1	M
495\18	43	M	15	0	0.4		16	18	8	100	0	1	M
1247\18	52	F	5	0	0.9		24	17	28	91.4	0	1	F
988\18	45	M		0	0.7		22	22	18	95.5	0	3	M
838\18	47	F	10	0	0.6		17	15	19	98.9	0	1	F
1127\18	47	M	10	0							1	1	M
783\18	64	M	20	0	0.6		3	11	20	91	0	3	M
709\18	22	M		0	0.6		16	14	12	93.1	0	2	M
536\18	35	M	10	0	1.4		17	13	20	98.7	0	1	M
1222\18	20	F	15	0	0.8		11	8	9	94.4	0	1	F
1155\18		M		0	0.6		17	17	9	84.1	0	0	M
702\18	20	M	4	0	0.7		29	57	25	89.6	0	0	M
1327\18	24	M	10	0	0.9		24	18	13	87.9	0	1	M
478\18	45	M		0	0.5		21	19	13	84.3	0	1	M
391\18	31	M	10	0	0.8		22	13	19	96.8	0	4	M
414\18	39	M		0	0.9					87.5	0	1	M
717\18	35	M	8	0	0.9		40	22	22	97.7	0	1	M
928\18	45	M		0	1.2		46	117	93	90.1	0	1	M
730\18	33	F		0	0.8		15	7	10	94.7	0	1	F
1225\18	41	M	15	0	0.7		15	18	18	85.9	0	1	M
877\18	48	M	20	0	0.9		17	18	32	91.1	0	1	M
695\18	28	M	15	0	0.5		13	10	16	93.2	0	2	M
557\18	45	M	20	0	0.6		19	29	29	92.2	0	3	M
694\18	41	M	8	0	0.6		15	21	22	98	0	1	M
409\18	28	M		0	0.9		17	13	9	86.1	0	1	M
966\18	50	M		0	0.6		17	13	18	92.5	0	1	M
1259\18	27	M	3	0	0.8		21	18	14	92.7	0	1	M
971\18	27	F		0	0.4		19	13	11	93.9	0	0	F
446\18	28	F		0	0.5		29	24	13	94.4	0	0	F
443\18	50	M	20	0	1.5		18	10	11	87.3	0	1	M
487\18	38	M	8	0	0.4		22	16	14	92.6	0	1	M
740\18	44	M	20	0	0.4		18	15	11	93	0	1	M
911\18	24	M	10	0	0.8		23	23	21	87.5	0	2	F
1030\18	43	M	20	0	0.5		15	12	13	91.6	0	1	M
533\18	52	M		0	1.2		6	24	26	93.4	0	2	M
530\18	63	M	6	0	0.6		28	24	14	106	0	1	M
816\18	38	M	20	0	0.9		25	22	69	93.7	0	2	M
518\18	30	M	15	0	0.8		19	19	13	96.9	0	1	M
1294\18	46	M	10	0	1.3		15	15	18	69.2	0	1	M
514\18	33	M	10	0	0.5		23	19	11	90.9	0	1	M
458\18	56	F		0	0.7		25	19	32	94.3	0	1	F
1254\18	37	M	10	0	0.9		21	39	39	74.4	0	1	M
810\18	53	M		0	0.6		16	17	38	94.6	0	2	M
987\18	47	M	8	0	0.5		21	18	13	69.4	0	4	M
1106\18	44	M	20	0	0.5		23	23	17		0	1	M
707\18	22	F	10	0	0.5		18	11	24	92.1	0	1	F
1255\18	43	M	20	0	1.1		18	31	49	88.4	0	1	M
673\18	39	F	5	0	0.5		17	9	11	86	0	1	F
496\18	42	M	10	0	0.8		22	36	34	91.9	0	1	M
471\18	25	M	10	0	1		18	16	18	91.4	0	1	M
454\18	33	M	10	0	0.7		21	15	14	94.6	0	1	M
1076\18	37	M	10	0	0.8		40	50	23	93.5	0	3	M
1209\18	42	M		0	0.5		30	22	22	96.2	0	1	M
1275\18	33	F	10	0	0.5		18	17	11	96.3	0	2	F
1291\18	65	M		0	0.9		17	14	48	98.5	0	3	M
873\18	36	M	10	0	0.6		12	12	17	96.1	0	3	M
1009\18	32	M	15	0	0.9		13	15	22	91.7	0	2	M
1307\18	57	M	30	0	1		17	14	15	95.7	0	1	M
779\18	28	M	10	0	0.6		17	20	17	92.1	0	2	M
731\18	28	M	3	0	0.8		27	22	18	94.1	0	2	M
1017\18	52	M		0	0.8		21	22	49	83.7	0	2	M
552\18	53	M	20	0	0.4		20	27	24	94.4	0	4	M
1249\18	39	M		0	0.9		20	26	36	91.3	0	3	M
542\18	27	F	6	0	0.5		22	18	26	95.1	0	1	F
985\18	36	M	10	0	0.9		29	45	59	94.7	0	1	M
1036\18	51	M		0	0.8		23	30	55	94.7	0	2	M
797\18	34	M		0	0.5		17	15	16	92.3	0	1	M
705\18	32	M	1	0	0.7		32	41	48	93.6	0	2	M
782\18	46	M		0	0.6		19	18	26	91.1	0	1	M
392\18	34	M	20	0	0.8		26	50	37	90.5	0	2	M
1240\18	30	F	15	0	1		14	11	19	90.4	0	1	F
1302\18	56	M	15	0	0.8		17	12	19	89.3	0	1	M
1266\18	47	M	10	0	0.7		18	17	19	87.3	0	2	M
511\18	28	M	12	0	0.6		21	18	11	94.6	0	1	M
1389\18	25	M	20	0							1	2	M
970\18	34	M	10	0	0.8		16	20	18	92.5	0	1	M
668\18	27	F	5	0	0.6		15	26	12	89.7	0	1	F
757\18	30	M	10	0	0.7		22	23	25	91	0	1	M
1310\18	40	F	15	0	1		18	7	28	97.8	0	1	F
841\18	57	M	5	0	0.7		16	17	14	87.9	0	1	M
946\18	27	M	25	0	0.5		20	25	22	88.1	0	2	M
1028\18	52	M	18	0	0.8		31	32	53	89.4	0	2	M
743\18	42	M	15	0	0.9		20	25	40	92.2	0	1	M
1335\18	45	M		0	0.7		18	18	21	86.4	0	2	M
870\18	53	M	15	0	0.7		14	14	34	93.2	0	1	M
373\18	26	M		0	0.6		21	18	11	91.8	0	2	M
512\18	55	F		0	0.6		23	19	25	96.9	0	2	F
807\18	36	M		0	0.9		27	27	17	90.1	0	1	M
1260\18	35	M	28	0	0.7		22	20	30	93.5	0	1	M
830\18	40	M	12	0	0.7		23	20	12	95.8	0	1	M
720\18	23	F	1	0	0.6		19	15	12	86.1	0	0	F
780\18	29	F	10	0	0.6		14	14	14	92.2	0	1	F
891\18	44	M	15	0	0.6		20	17	17	93.5	0	1	M
1027\18	23	M	15	0	0.6		23	15	20	93.2	0	2	M
793\18	25	F	3	0	0.6		17	12	13	92.6	0	4	F
935\18	34	F		0	0.7		20	20	11	91.2	0	2	F
469\18	34	M	5	0	0.7		18	27	21	88.4	0	1	M
868\18	20	M	30	0	0.5		15	13	15	91.5	0	0	M
1060\18	51	M		0	0.7		20	21	24	93.2	0	3	M
675\18	50	M		0	0.7		20	25	24	97.4	0	1	M
765\18	40	M	10	0	0.7		23	32	21	88.3	0	1	M
889\18	34	M	20	0	0.7		33	27	22	96.7	0	1	M
753\18	56	F		0	0.4		4	21	20	96.2	0	2	F
940\18	30	M	20	0	0.9		23	31	50	91.5	0	1	M
682\18	41	F	8	0	0.5		13	10	21	93.9	0	1	F
989\18	20	M	20	0	0.3		16	10	10	94	0	1	M
924\18	29	M	30	0	1.6		18	18	21	92.7	1	1	M
503\18	57	M		0	0.4		17	12	23	96.4	0	2	M
922\18	40	M	30	0	0.8		33	21	29	90.5	0	1	M
1008\18	28	M	30	0	0.6		26	23	13	95.4	0	1	M
1303\18	34	M	10	0	0.8		17	21	24	87.2	0	4	M
445\18	43	M		0	0.8		24	28	24	96.1	0	1	M
829\18	44	M	15	0	1.1		2	15	14	89.3	0	1	M
1158\18	62	M	11	0	1		33	28	51	93	0	0	M
658\18	42	M	5	0	0.5		17	18	21	97	0	1	M
850\18	27	F	15	0	0.4		12	11	12	94	0	1	F
1322\18	40	M		0	1.2		61	162	334	91.7	0	2	M
420\18	37	M	20	0	0.6		24	28	53	102	0	1	M
1044\18	48	M		0	0.5		21	18	13	90.2	0	5	M
601\18	35	M		0	0.6		21	21	31	99.6	0	2	M
852\18	29	M		0	0.8		16	16	12	88.1	0	1	M
1005\18	29	F	7	0	0.6		13	9	12	95.3	0	4	F
847\18	19	M	15	0	0.8		20	25	172	91.7	0	1	M
1056\18	40	F	15	0	0.8		11	14	17	94.6	0	1	F
762\18	40	M	10	0	0.3		21	17	19	94	0	4	M
863\18	29	M	30	0	0.9		21	8	16	90.3	0	5	M
715\18	27	M	20	0	0.6		15	10	20	64.4	0	1	M
756\18	30	M	10	0	0.5		24	16	13	95	0	0	M
398\18	19	M	15	0	0.7		26	37	18	87.9	0	2	M
1150\18	36	M	40	0	0.7		17	29	76	94.2	0	3	M
453\18	36	F	10	0	0.5		22	19	8	92.2	0	2	F
1256\18	49	F	15	0	2.8		16	3	18	92.1	1	1	F
764\18	49	M	20	0	0.5		16	11	16	91	0	1	M
1304\18	33	M	10	1	1.4		19	33	39	86.7	0	1	M
562\18	38	M	2	1	0.5		19	23	18	94.4	0	1	M
769\18	38	F	20	1	0.8		14	11	14	97.9	0	1	F
957\18	41	M	8	1	0.6		32	25	23	91.1	0	6	M
1221\18	33	F	5	1	0.5		11	9	14	88	0	1	F
680\18	42	M		1	1.1		21	23	21	94.9	0	1	M
1235\18	34	M	15	1	0.7		29	23	27	90.4	0	3	M
719\18	26	F		1	0.5		18	22	13	91.6	0	1	F
385\18	19	M	3	1							1	1	M
979\18	42	M		1	0.7		16	20	12	91.6	0	1	M
772\18	29	M	15	1	0.8		15	14	15	93.7	0	2	M
1137\18	37	M	15	1							1	3	M
693\18	42	M	10	1							1	3	M
789\18	43	M	10	1	0.6		13	10	25	95.5	0	1	M
508\18	45	M		1	0.4		28	25	27	89.1	0	1	M
1197\18	46	M	10	1	1.8		32	61	90	92.4	1	1	M
742\18	30	M		1	1.1		26	27	17	90.3	0	1	M
522\18	30	F	6	1	0.7		20	13	11	89.7	0	1	F
678\18	28	M		1	0.9		21	19	29	90.8	0	1	M
767\18	35	F	15	1	1.7		24	18	19	100	1	4	F
843\18	32	M		1	0.6		28	40	20	93.2	0	1	M
677\18	39	M	20	1	0.8		19	22	24	95.5	0	1	M
399\18	27	M	15	1	0.8		18	22	14	90.6	0	1	M
1181\18	60	M	20	1	0.9		19	21	23	93.8	0	1	M
679\18	28	M	15	1	2.5		22	17	26	95.8	1	2	M
452\18	30	M		1	0.7		15	22	14	91.1	0	1	M
919\18	40	M	20	1	0.8		19	19	35	87.1	0	1	M
1107\18	27	M	2	1	0.8		19	6	21		0	1	M
1325\18	39	M		1	0.8		22	21	14		0	1	M
596\18	41	M	2	1	1.2		15	16	22	87.9	0	1	M
598\18	53	M	15	1	0.7		32	30	76	102	0	2	M
1055\18	53	M		1	0.6		16	17	28	84.7	0	1	M
952\18	59	M	15	1	0.6		18	7	25	92.6	0	6	M
909\18	50	M	10	1	0.6		26	43	40	98.9	0	1	M
984\18	31	M	1	1	0.7		20	23	16	87	0	2	M
1242\18	24	M	16	1	0.8		18	19	17	88.9	0	1	M
836\18	30	M	20	1	0.4		17	26	32	91.8	0	1	M
692\18	49	M	20	1	0.4		19	27	15	90.7	0	1	M
763\18	44	M		1	0.6		24	22	16	95.8	0	2	M
963\18	42	M	10	1	0.6		25	35	27	96	0	1	M
791\18	27	M		1	0.5		22	14	18	94.8	0	3	M
1223\18	38	M	20	1	0.5		17	16	22	90.9	0	1	M
1012\18	46	F	15	1	0.4		14	11	16	99.6	0	1	F
913\18	45	M	20	1	0.5		21	21	26	100	0	6	M
897\18	44	M	10	1	0.5		19	14	10	95.2	0	1	M
444\18	40	M	8	1	1.1		15	15	22	97.6	0	1	M
366\18	63	M	15	1	2.1		16	14	0	106	1	1	M
1112\18	42	M	15	1	0.6		39	66	79		0	1	M
1059\18	51	F	20	1	0.6		22	15	27	91.4	0	2	F
1184\18	50	M	10	1	0.7		67	59	101		0	4	M
771\18	27	M		1	0.8		21	28	32	89	0	1	M
886\18	28	M	20	1	0.8		19	28	42	77.2	0	2	M
368\18	31	M	6	1	0.7		27	21	40	87.2	0	1	M
556\18	22	F	15	1	0.8		13	7	9	88.6	0	1	F
600\18	44	M	1	1	0.4		22	28	28	65.9	0	2	M
1156\18	23	M	18	1	1.2		33	29	50	92.7	0	6	M
388\18	44	M		1	0.9		20	18	22	85.8	0	6	M
860\18	48	M	15	1	0.9		31	29	97	99.4	0	2	M
384\18	30	F	10	1	0.6		21	12	14	91.2	0	2	F
822\18	31	M	15	1	1		16	15	6	90.1	0	1	M
933\18	40	M		1	1.1		20	30	46	87.8	0	1	M
706\18	47	F	20	1	0.9		20	27	24	98.1	0	2	F
895\18	38	M	10	1	0.5		15	9	16	93.3	0	1	M
969\18	35	M		1	0.5		17	18	16	95.5	0	1	M
871\18	30	M		1	1		20	14	11	87.3	0	1	M
827\18	22	M	15	1	0.3		23	20	13	90.8	0	1	M
415\18	55	F	4	1	0.9		24	18	17	97.8	0	1	F
1121\18	27	M	12	1							1	1	M
1323\18	33	M		1	1.4		19	27	25	88.6	0	1	M
864\18	40	M	8	1	0.5		23	32	40	90.4	0	2	M
515\18	33	F		1	0.6		21	20	38	94.4	0	1	F
792\18	24	M	10	1	0.7		17	15	13	96.2	0	1	M
1238\18		F		1	0.6		15	10	8	88.2	0	1	F
696\18	44	M	10	1	0.9		29	38	139	90.4	0	1	M
894\18	39	M		1	0.6		42	71	53	97.2	0	1	M
727\18	55	M		1	0.7		19	27	18	89	0	2	M
1097\18	43	M	5	1	1.2		19	28	50		0	1	M
669\18	42	M	20	1	0.7		16	11	16	95.6	0	1	M
734\18	37	M	20	1	0.7		14	21	28	95.4	0	1	M
560\18	25	M		1	0.6		22	20	18	65.1	0	2	M
674\18	32	M	6	1	0.8		22	12	12	93.8	0	1	M
535\18	35	M		1	0.7		20	22	22	90.9	0	1	M
902\18	57	M	10	1	0.7		27	27	39	94.8	0	1	M
377\18	33	M	10	1	0.9		255	165	75	93.6	0	1	M
488\18	32	M		1	0.7		20	34	31	88.7	0	6	M
747\18	34	F	10	1	0.9		14	13	10	67.5	0	1	F
593\18	29	F	5	1	0.7		13	12	12	94.2	0	1	F
1129\18	40	M	15	1							1	1	M
462\18	42	M	15	1	1.2		17	18	23	91.5	0	1	M
948\18	30	M		1	0.5		14	10	9	95	0	1	M
907\18	37	M	15	1	0.4		20	28	30	91.2	0	1	M
472\18	40	M	5	1	0.9		30	26	19	93.2	0	2	M
442\18	26	M	20	1	0.6		15	13	29	94.8	0	1	M
926\18	35	M	30	1	1.6		20	21	32	97.4	1	1	M
1035\18	21	M	3	1	0.8		16	14	18	90	0	1	M
501\18	30	M	20	1	0.8		22	19	17	88.4	0	1	M
492\18 p	30	M	3	1							1	1	M
942\18	46	F		1	0.5		20	17	14	92.1	0	1	F
1037\18	37	M	15	1	0.6		14	17	22	91.5	0	4	M
395\18	44	M	20	1	0.9		25	24	36	102	0	3	M
724\18	29	M	1	1	0.8		17	23	24	92.4	0	1	M
1226\18	41	F	10	1	0.6		21	15	5	90.9	0	1	F
901\18	47	M		1	0.6		20	17	20	88.7	0	1	M
378\18	35	M		1	0.5		17	25	16	97.2	0	1	M
1250\18	38	M	15	1	1.3		17	16	18	92.6	0	1	M
402\18	32	M	1	1	0.4		20	21	18	89.8	0	1	M
1130\18	46	M		1							1	1	M
460\18	56	M		1	0.8		17	19	23	92.1	0	1	M
1268\18	39	M	10	1	0.9		22	39	55	64.4	0	2	M
751\18	29	F		1	0.6		15	14	20	89.9	0	1	F
1237\18	42	M		1	0.8		24	27	103	86	0	1	M
699\18	35	M	30	1	0.6		15	17	14	96.3	0	1	M
390\18	44	M	20	1	0.8		20	10	15	93.1	0	1	M
828\18	23	M		1	0.5		17	17	18	89.8	0	1	M
964\18	43	M		1	0.6		25	17	20	95.3	0	1	M
1068\18	51	M	15	1	0.7		21	17	86	88.9	0	3	M
918\18	30	M	15	1	0.6		18	20	23	96.7	0	1	M
712\18	39	M		1	0.6		19	16	17	91.8	0	1	M
484\18	41	M	15	1	0.6		23	35	37	94.7	0	1	M
1196\18	31	M	15	1	0.8		22	52	26		0	1	M
369\18	38	M		1	0.7		18	26	18	83.9	0	1	M
505\18	42	M		1	0.5		29	35	21	91.1	0	1	M
473\18	38	M		1	0.9		22	55	31	95.2	0	6	M
870\18	50	F	10	1	0.6		16	18	25	91.4	0	1	F
758\18	28	M	3	1	0.4		16	16	14	92.7	0	2	M
775\18	40	M		1	0.5		19	21	12	93.3	0	1	M
1026\18	40	M		1	0.7		54	117	74	91.3	0	1	M
423\18	54	M		1	1.2		22	17	40	91.4	0	1	M
725\18	49	F		1	0.6		21	11	13	95.5	0	3	F
687\18	37	M	20	1	0.6		17	14	15	92.1	0	1	M
499\18	41	M	10	1	0.7		22	45	41	94.7	0	1	M
921\18	27	F	2	1	0.7		17	17	20	89.7	0	1	F
704\18	30	M	15	1	0.6		19	13	25	96.4	0	1	M
1010\18	36	M	1	1	0.4		20	33	50	88.5	0	1	M
513\18	27	M		1	0.9		15	18	16		0	1	M
665\18	51	M		1	0.7		23	17	17	95.9	0	1	M
407\18	27	M	20	1	2.3		23	42	26	90.7	1	1	M
602\18	31	M		1	0.9		23	19	15	93.5	0		M
1038\18 p	49	M		1	0.7		17	19	21	91.2	0	1	M
676\18	37	M	2	1	0.8		14	20	20	90.5	0	1	M
1152\18	47	M	15	1	0.5		27	31	28	93.3	0	1	M
905\18	49	M		1	0.7		20	19	37	90.9	0	2	M
872\18	38	M	10	1	0.7		15	21	25	91	0	1	M
1284\18	26	M	20	1	1.2					97.3	0	1	M
1248\18	57	M	20	1	1.1		15	17	20	94	0	1	M
903\18	38	F		1	0.6		14	10	14	92.5	0	1	F
846\18	58	M		1	0.6		18	18	15	92.1	0	2	M
1214\18	42	M	10	1	0.2		19	19	12	86.3	0	1	M
371\18	56	M	10	1	0.8		16	18	26	96.3	0	1	M
592\18	44	M	15	1	0.7		36	51	38	91.3	0	1	M
746\18	67	M		1	0.2		15	10	18	84.4	0	1	M
821\18	51	M		1	0.7		20	22	12	89.7	0	1	M
403\18	33	F		1	0.9		16	9	10	88.4	0	1	F
456\18	60	M		1	0.9		16	19	28		0	1	M
526\18	21	F		1	0.3		10	13	14	92.7	0	1	F
1220\18	21	M	5	1	0.6		20	23	18	93.3	0	1	M
382\18	38	M		1	0.8		18	17	20	96.1	0	2	M
1049\18	25	M	5	1	0.8		15	16	20	82.7	0	1	M
738\18	25	M	20	1	0.7		18	23	50	93.9	0	1	M
869\18	25	M	5	1	0.5		18	13	15	90.2	0	1	M
500\18	33	M		1	0.5		23	25	14	91.5	0	6	M
825\18	42	M		1	0.7		22	18	21	91.6	0	1	M
494\18	51	M		1	0.6		26	38	37	68.3	0	1	M
908\18	59	M		1	0.8		4	21	14	98.4	0	1	M
729\18	33	M		1	0.7		4	20	20	93.3	0	1	M
697\18	32	F	10	1	0.6		19	15	13	92.3	0	2	F
1317\18	32	M		1	0.7		22	22	29	89.9	0	1	M
667\18	29	M		1	1.4		18	16	17	91.6	0	1	M
890\18	57	M		1	0.7		31	40	124	91.6	0	1	M
912\18	46	M	5	1	0.4		24	25	20	94.4	0	1	M
